# Supplementary material for: ﻿DNA barcode library of Portuguese water mites, with the descriptions of two new species (Acari, Hydrachnidia)
Source: PubMed Central journal article supplement (PMC11544308; doi:10.3897/zookeys.1217.131730), 2024-10-31

# BOLD TaxonID Tree

Title : Tree Result - DS-PGHYD (307 records selected)  
Date : 16-May-2024  
Data Type : Nucleotide  
Distance Model : Kimura 2 Parameter  
Marker : COI-5P  
Colourization : [blue]=Stop Codons [red]=Contamination or misidentification

Label : Sample ID  
Label : Process ID  
Label : Taxonomy Notes  
Label : Taxon  
Label : Province/State  
Label : Barcode Cluster (BIN)

Sequence Count : 307  
Species count : 49  
Genus count : 24  
Family count : 16  
Unidentified : 55

BIN Count : 76

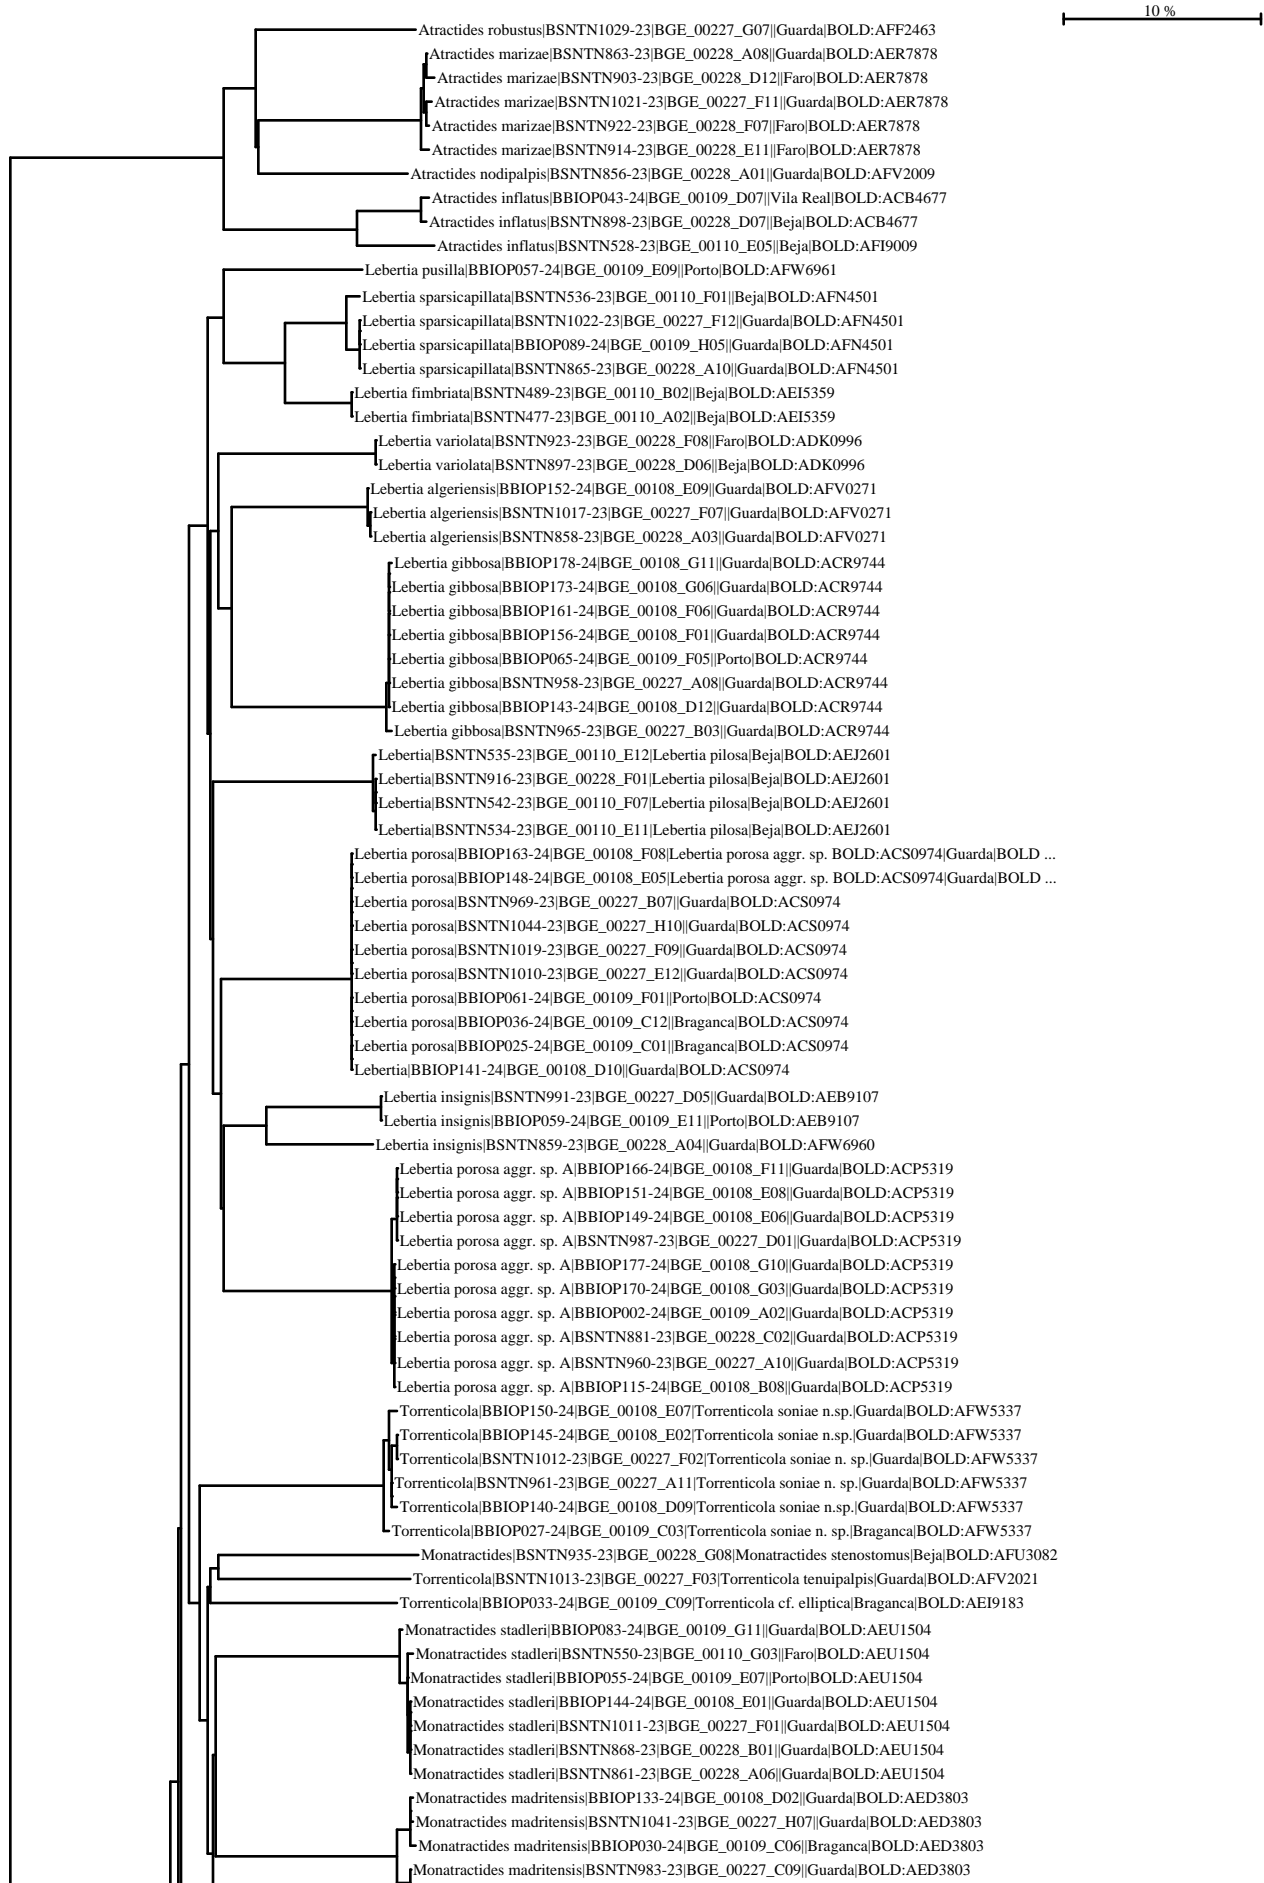

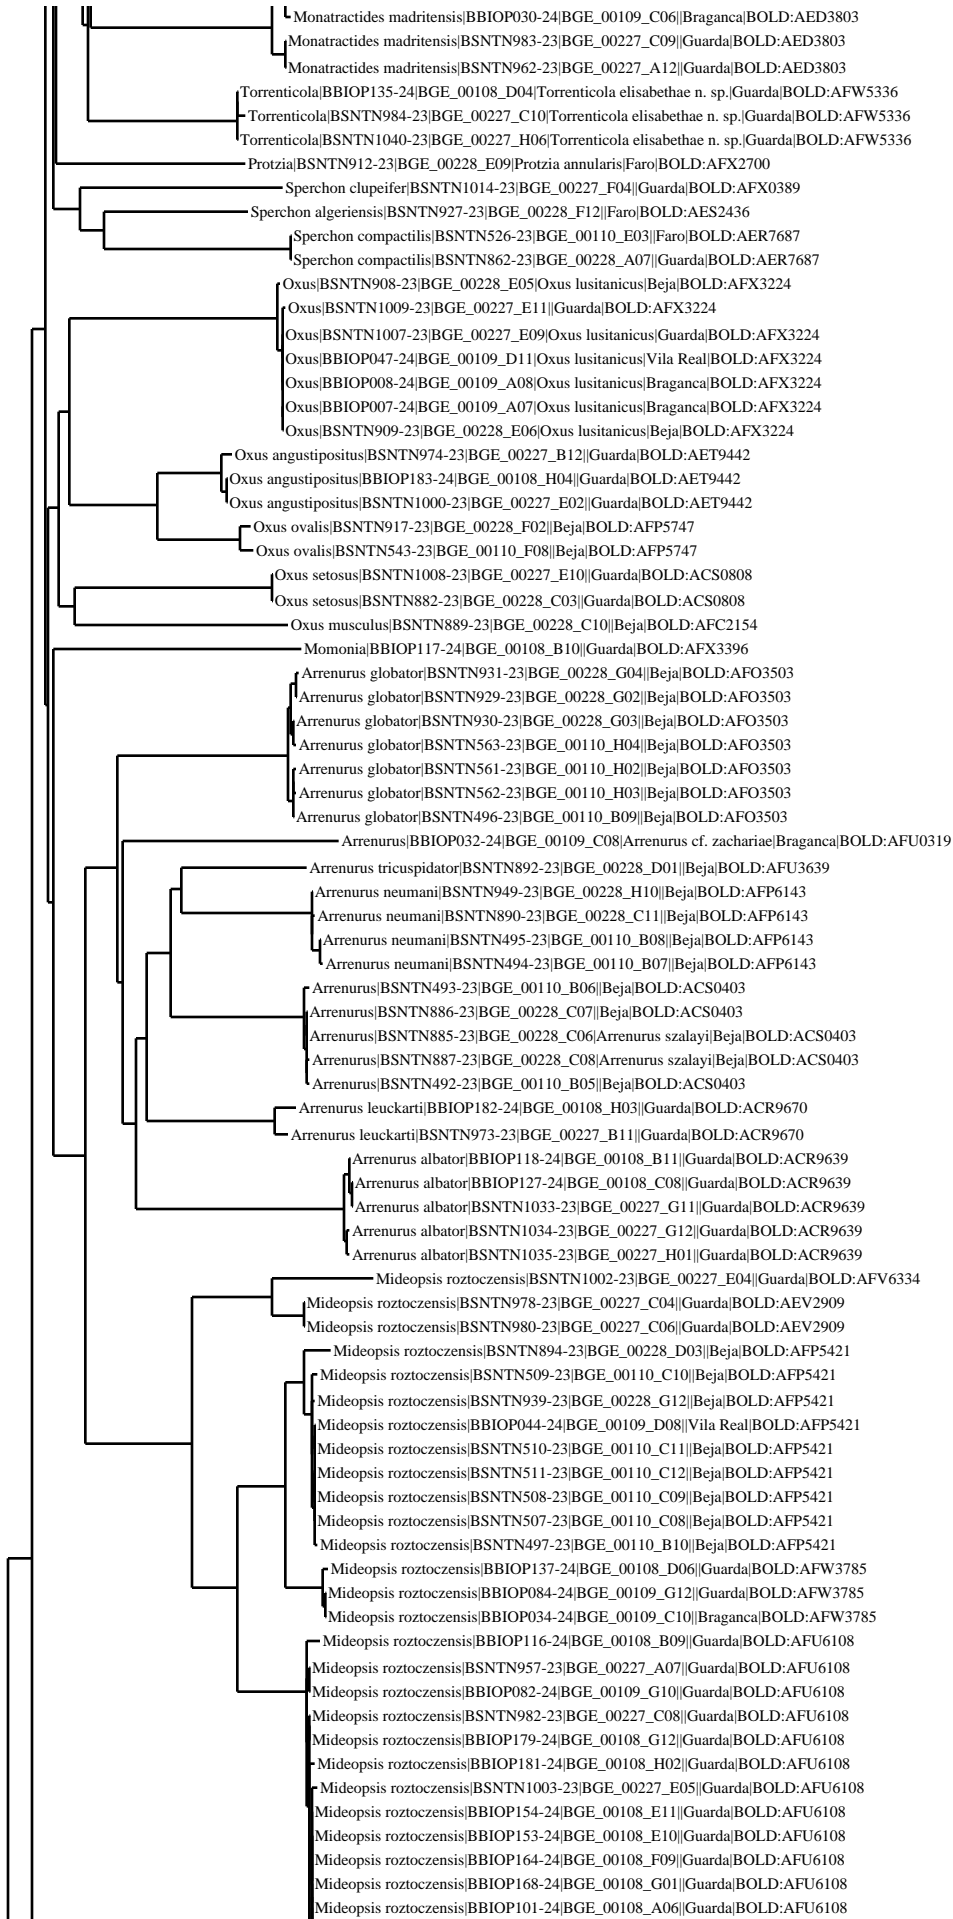

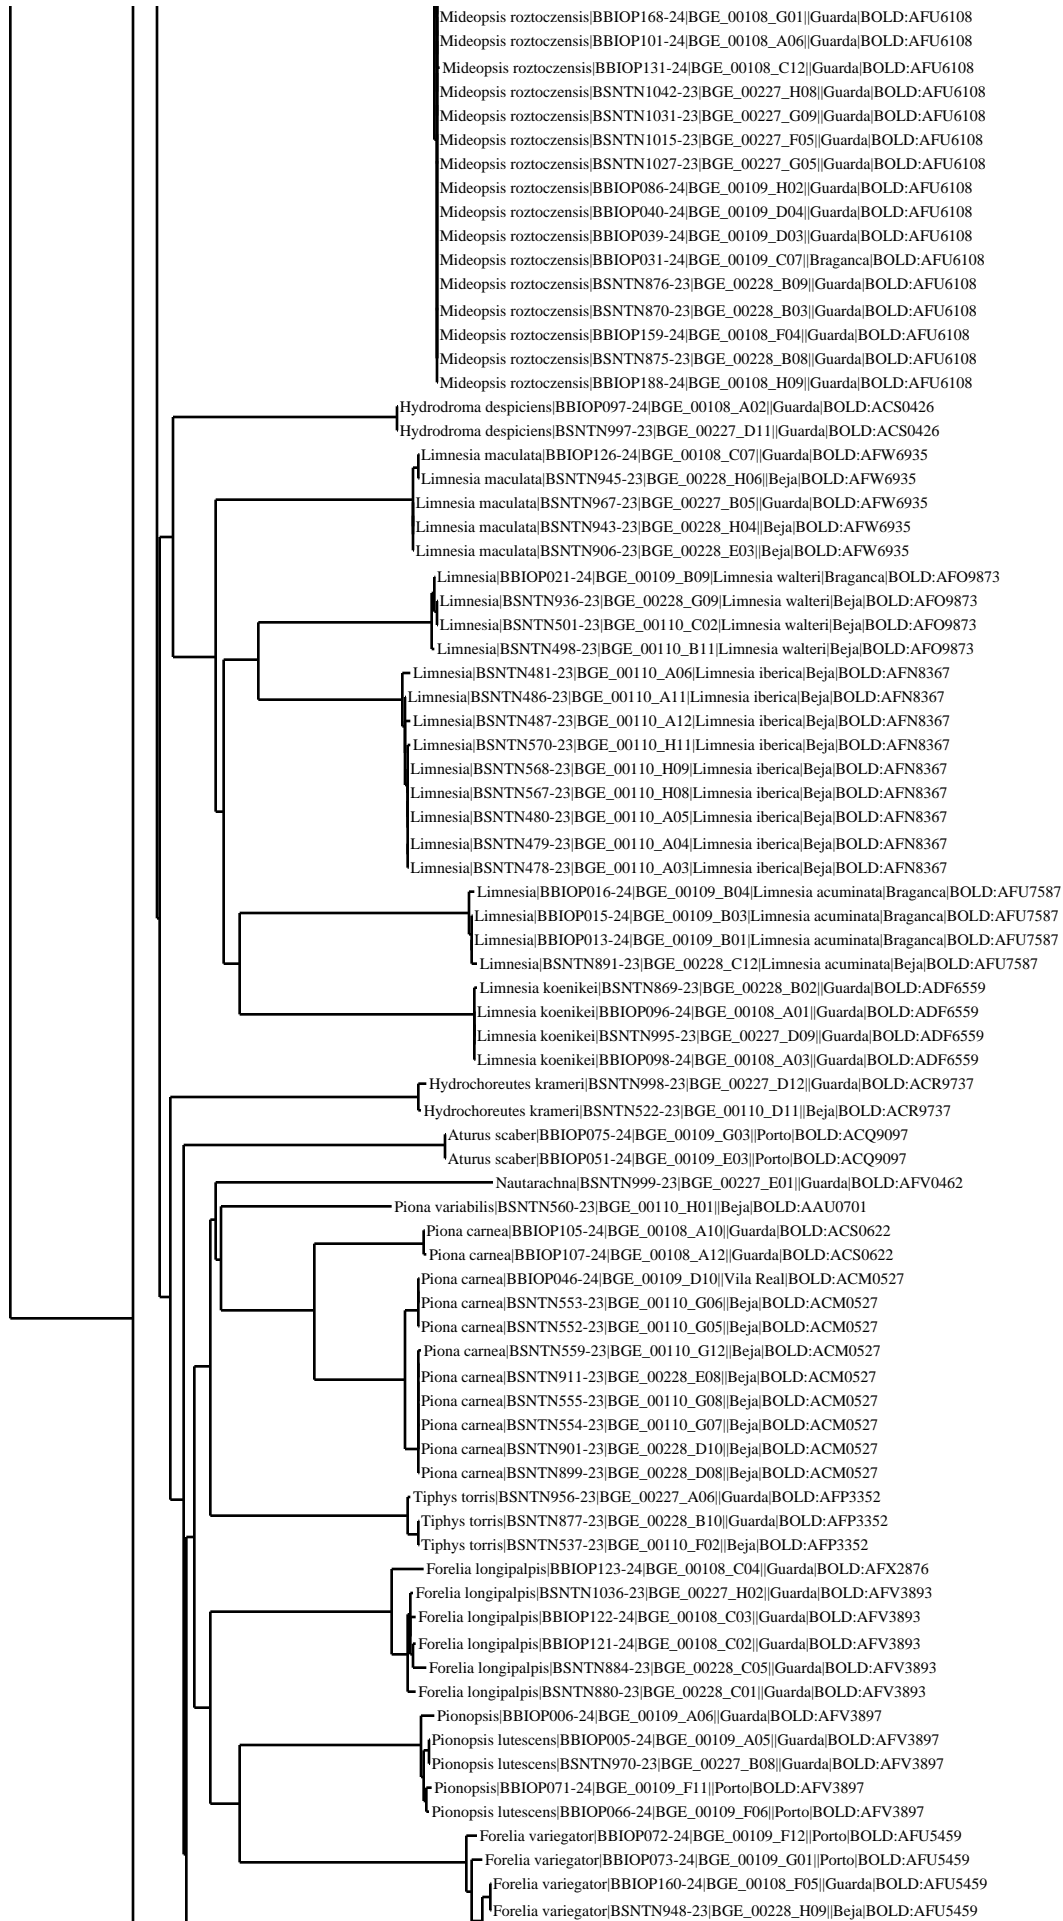

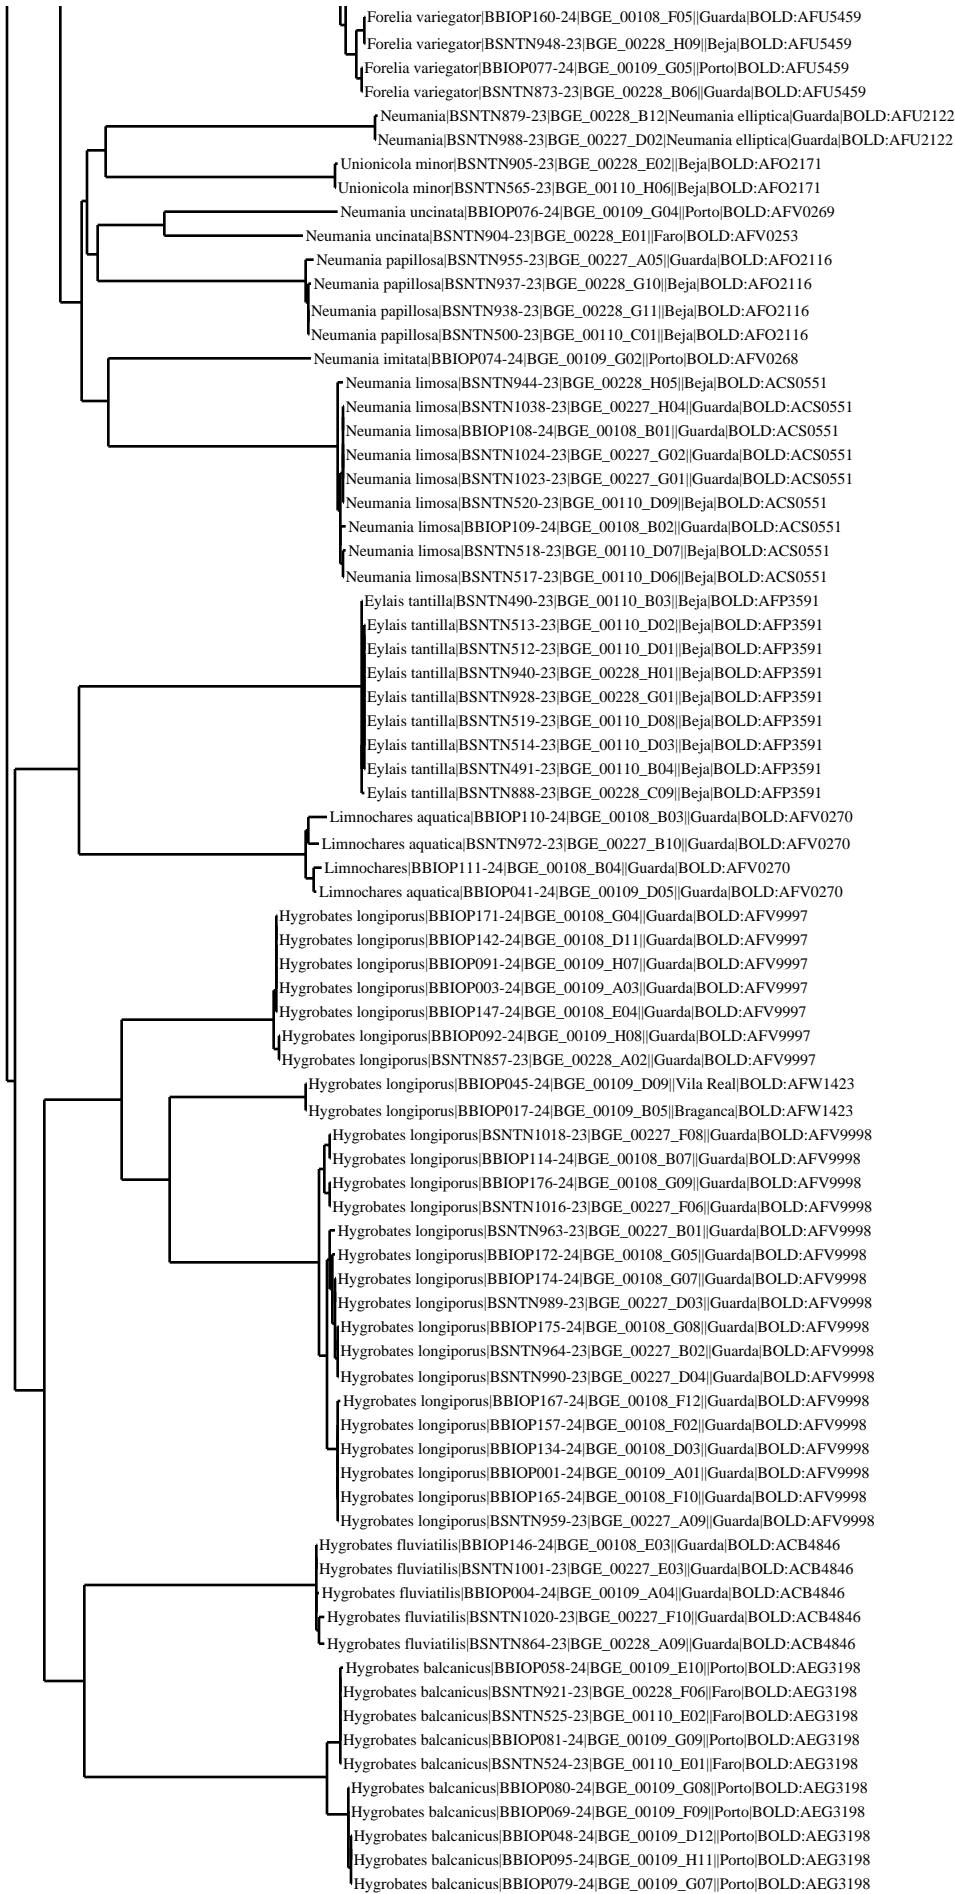

Supplement: zookeys-1217-119_article-131730__-s001.pdf [file zookeys-1217-119_article-131730__-s001.pdf]
